# Supplementary material
Source: publisher figshare collection journal article supplement (https://tandf.figshare.com/ndownloader/files/13180601)

Supplementary material for

**Combined effects of straw-derived biochar** **and bio-based polymer-coated urea on nitrogen use efficiency and cotton yield**

Xiaojing Yu a, Xiaofei Tianb, &, Yanyan Lua, Zhiguang Liua, Yanle Guoa, Jianqiu Chenc, Chengliang Lia*,Min Zhanga,c*, Yongshan Wand

a National Engineering Laboratory for Efficient Utilization of Soil and Fertilizer Resources, College of Resources and Environment, Shandong Agricultural University, Tai’an 271018, China

b School of Environment and Planning, Liaocheng University, Liao’cheng 252059, China

c State Key Laboratory of Nutrition Resources Integrated Utilization, Kingenta Ecological Engineering Group Co., Ltd. Lin’shu 276700, China

d Department of Soil and Water Sciences, Tropical Research and Education Center, IFAS, University of Florida, Homestead, FL 33031, USA

& Yu and Tian contributed equally to this work and should be considered co-first authors.

*Corresponding authors E-mail addresses: chengliang_li11@163.com (C. Li), minzhang-2002@163.com (M. Zhang).

**Supplementary** Table 1 Source of variance of soil NO3--N and NH4+-N contents

**Supplementary** Figure 1 Temperature and precipitation during the incubation and cotton growth period

**Supplementary** Figure 2 Structural characterizations of BPCU (A) and biochar (B) by FTIR

**Supplementary** Figure 3 Biochar N2 adsorption/ desorption isotherms and pore size distribution

**Supplementary** Table 1 Source of variance of soil NO3--N and NH4+-N contents

| Stage | Seeding stage | First bloom stage | Full bolling stage | Initial boll opening stage | Maturity stage |
| --- | --- | --- | --- | --- | --- |
| NO3--N contents | | | | | |
| C | <0.0001 | 0.0052 | 0.0005 | 0.0014 | 0.0121 |
| N | <0.0001 | <0.0001 | <0.0001 | <0.0001 | <0.0001 |
| Interaction | 0.0414 | 0.8536 | 0.3184 | 0.2049 | 0.0184 |
| NH4+-N contents | | | | | |
| C | 0.0031 | <0.0001 | 0.4901 | 0.3110 | 0.0515 |
| N | <0.0001 | <0.0001 | <0.0001 | <0.0001 | 0.0008 |
| Interaction | 0.4972 | 0.1636 | 0.5058 | 0.9745 | 0.7555 |

Supplementary Figure 1 Temperature during the incubation and cotton growth period.
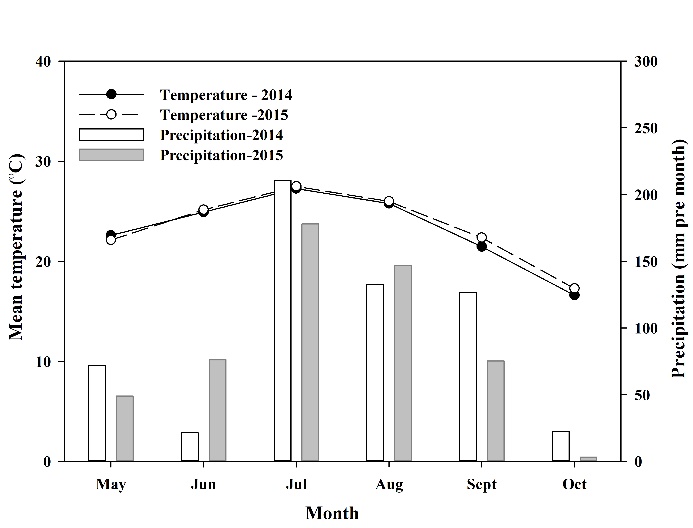


Supplementary Figure 2 Structural characterizations of BPCU (A) and biochar (B) by FTIR.


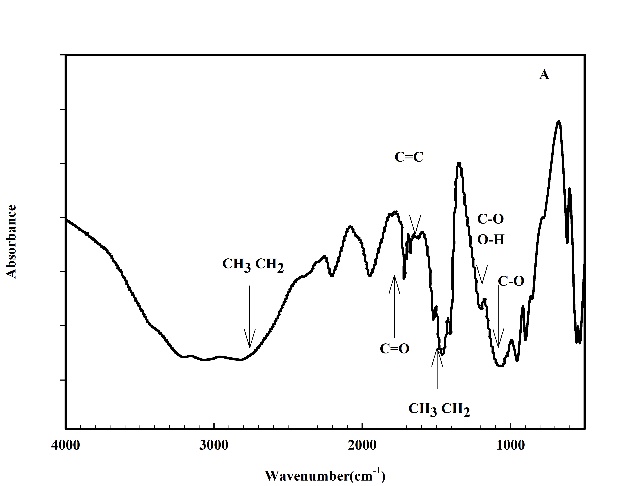

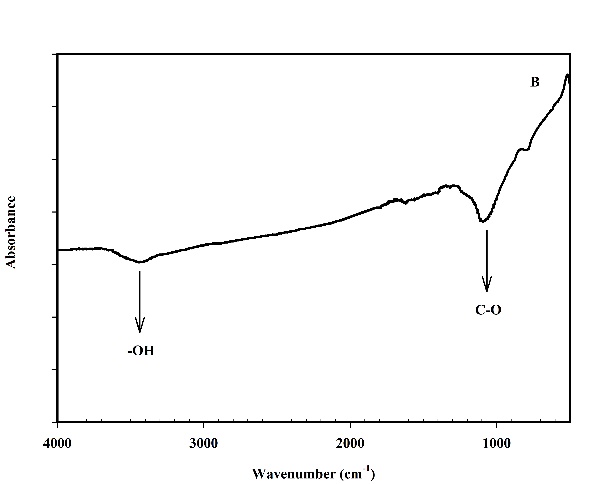


Supplementary Figure 3 Biochar N2 adsorption/ desorption isotherms and pore size distribution


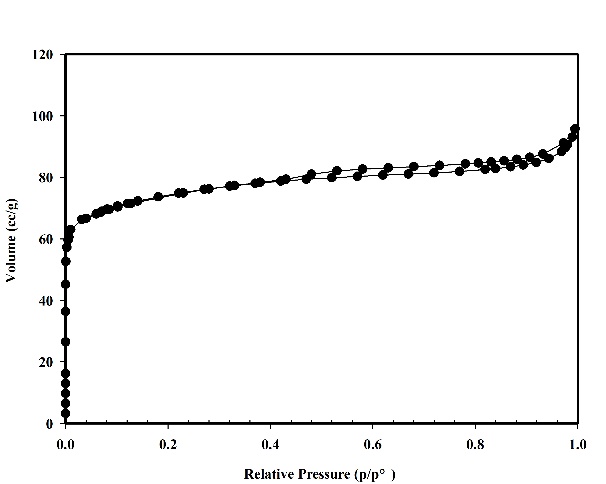

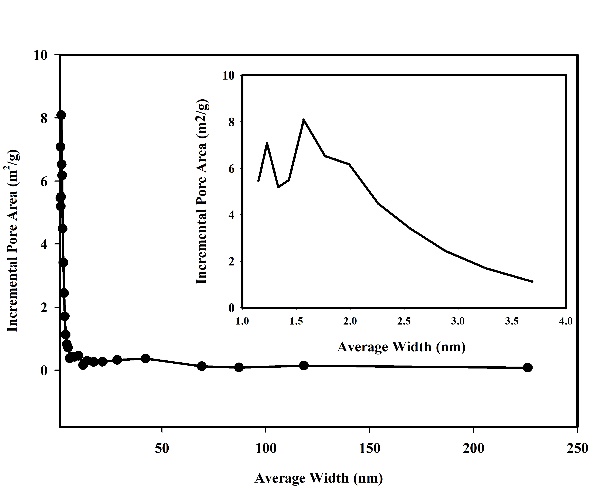

Supplement: Supplementary file 1 [file 13180601]
